# Supplementary material for: Calcium silicate/bortezomib combinatory therapy for multiple myeloma
Source: Royal Society of Chemistry journal article supplement (doi:10.1039/d2tb02009b), 2023-01-01
Supplement: d2tb02009b1.pdf [file d2tb02009b1.pdf]

### Supporting Information

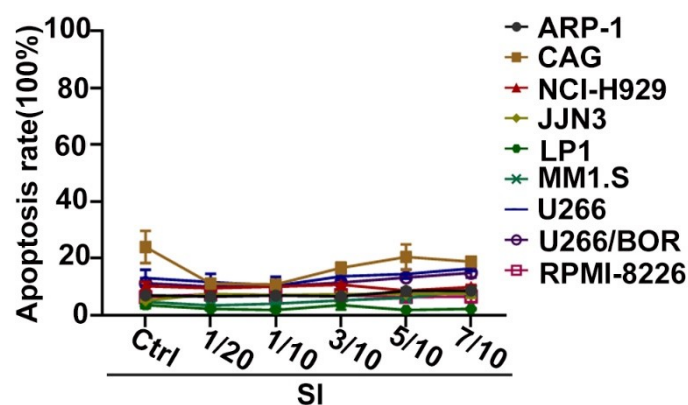

**Figure S1** SI does not induce HMCLs apoptosis. HMCLs were incubated with indicated concentrations of CS for 24h and submitted to flow cytometry to analyze cell apoptosis.

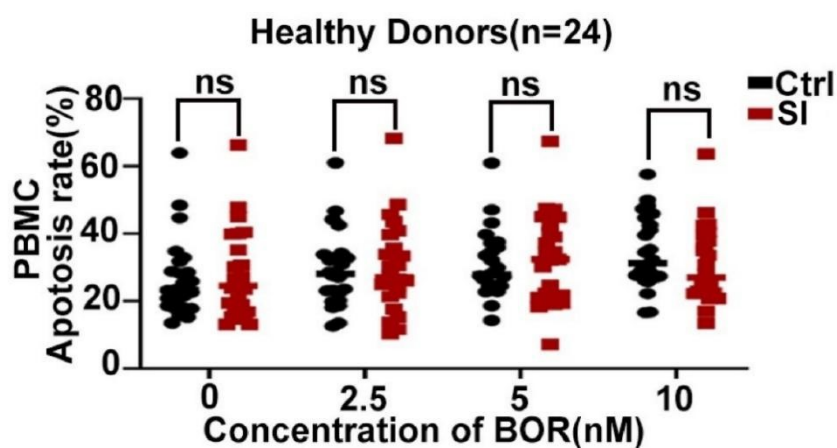

**Figure S2** The SI/BOR combination treatment does not induce apoptosis of Peripheral blood mononuclear cells. Peripheral blood mononuclear cells isolated from healthy donors were exposed to 1/2 concentration of SI and/or BOR (concentration was indicated in the picture) for 24 h and analyzed by flow cytometry.

**Table S1** The IC<sub>50</sub> values of BOR

| Cell lines | APR-1 | U266 | U266/BOR |
|------------|-------|------|----------|
|------------|-------|------|----------|

|                                  |                  |                  |                     |
|----------------------------------|------------------|------------------|---------------------|
| BOR alone<br>(IC50, (95%CI, nM)) | 5.31 (4.64-6.72) | 7.87 (7.0-10.0)  | 65.58 (44.38-92.85) |
| CS/BOR (IC50, (95%CI, nM))       | 3.01(2.41-3.60)  | 4.59 (3.97-5.29) | 18.44 (9.36-28.64)  |

---

**Table S2** Ion concentration of ceramic extracts diluted with control media.

|             | Ca (µg/ml) | P (µg/ml)  | Si (µg/ml)               |
|-------------|------------|------------|--------------------------|
| DMEM①       | 62.75±0.87 | 16.03±0.58 | 0.35±0.04                |
| RPMI 1640②  | 62.34±1.23 | 15.94±0.89 | 0.36±0.05                |
| CS/1 in ①   | 63.54±0.16 | 16.31±0.52 | 124.77±1.62 <sup>a</sup> |
| CS/1/2 in ① | 61.45±1.30 | 15.66±0.67 | 62.18±1.88 <sup>a</sup>  |
| CS/1/4 in ① | 61.90±1.53 | 16.08±0.66 | 30.38±1.15 <sup>a</sup>  |
| CS/1 in ②   | 62.32±1.00 | 16.29±0.41 | 124.30±5.07 <sup>a</sup> |
| CS/1/2 in ② | 62.00±1.45 | 15.44±0.48 | 61.08±3.12 <sup>a</sup>  |
| CS/1/4 in ② | 61.84±1.55 | 16.18±0.94 | 31.05±1.48 <sup>a</sup>  |

<sup>a</sup> Indicates that the Si ion concentration in the samples is significantly higher than those in control media of DMEM or RPMI 1640 ( $p < 0.01$ )

**Table S3** Patient clinical characteristics.

| No. | Gender | Age | FISH   | Disease Type | Disease Status | Revised International Staging System Stage | Durie-Salmon stage | Mayo risk stratification at diagnosis (mSMART) |
|-----|--------|-----|--------|--------------|----------------|--------------------------------------------|--------------------|------------------------------------------------|
| #1  | Male   | 47  | Normal | IgG, kappa   | NDMM           | I                                          | IIA                | Standard Risk                                  |
| #2  | Male   | 64  | Normal | IgA, kappa   | RRMM           | III                                        | IIIB               | High Risk                                      |

|     |        |    |                                  |            |      |     |      |               |
|-----|--------|----|----------------------------------|------------|------|-----|------|---------------|
| #3  | Female | 56 | Normal                           | IgG, kappa | NDMM | I   | IIA  | Standard Risk |
| #4  | Female | 64 | Normal                           | IgG, kappa | RRMM | II  | IIIB | Standard Risk |
| #5  | Male   | 61 | 1q21                             | IgA, kappa | NDMM | III | IIIB | Standard Risk |
| #6  | Male   | 69 | 13q14.3                          | IgG, kappa | NDMM | III | IIIA | High Risk     |
| #7  | Female | 74 | Normal                           | IgA, lamda | RRMM | I   | IIIB | Standard Risk |
| #8  | Male   | 83 | t(11,14);<br>t(4,14);<br>13q14.3 | IgD, kappa | NDMM | III | IIIB | High Risk     |
| #9  | Male   | 59 | 1q21                             | IgA, lamda | RRMM | III | IIIA | High Risk     |
| #10 | Female | 60 | 1q21                             | IgG, lamda | RRMM | III | IIIA | High Risk     |

---

## Reference

1. N. van de Donk, C. Pawlyn and K. L. Yong, *Lancet (London, England)*, 2021, **397**, 410-427.
2. S. K. Kumar, V. Rajkumar, R. A. Kyle, M. van Duin, P. Sonneveld, M. V. Mateos, F. Gay and K. C. Anderson, *Nature reviews. Disease primers*, 2017, **3**, 17046.
3. R. L. Siegel, K. D. Miller and A. Jemal, *CA: a cancer journal for clinicians*, 2016, **66**, 7-30.
4. A. J. Cowan, D. J. Green, M. Kwok, S. Lee, D. G. Coffey, L. A. Holmberg, S. Tuazon, A. K. Gopal and E. N. Libby, *JAMA*, 2022, **327**, 464-477.
5. K. Brigle and B. Rogers, *Seminars in oncology nursing*, 2017, **33**, 225-236.
6. S. K. Kumar, N. S. Callander, K. Adekola, L. Anderson, M. Baljevic, E. Campagnaro, J. J. Castillo, J. C. Chandler, C. Costello, Y. Efebera, M. Faiman, A. Garfall, K. Godby, J. Hillengass, L. Holmberg, M. Htut, C. A. Huff, Y. Kang, M. Hultcrantz, S. Larson, M. Liedtke, T. Martin, J. Omel, K. Shain, D. Sborov, K. Stockerl-Goldstein, D. Weber, J. Keller and R. Kumar, *Journal of the National Comprehensive Cancer Network : JNCCN*, 2020, **18**, 1685-1717.
7. T. C. Kouroukis, F. G. Baldassarre, A. E. Haynes, K. Imrie, D. E. Reece and M. C. Cheung, *Current oncology (Toronto, Ont.)*, 2014, **21**, e573-603.
8. Z. Su, S. Han, Q. Jin, N. Zhou, J. Lu, F. Shangguan, S. Yu, Y. Liu, L. Wang, J. Lu, Q. Li, L. Cai, C. Wang, X. Tian, L. Chen, W. Zheng and B. Lu, *Cell death & disease*, 2021, **12**, 251.
9. Y. Yang, Y. Li, H. Gu, M. Dong and Z. Cai, *Journal of hematology & oncology*, 2020, **13**, 150.
10. S. Yamamoto and N. Egashira, *International journal of molecular sciences*, 2021, **22**.
11. S. Mangiacavalli, L. Pochintesta, C. Pascutto, F. Cocito, A. Pompa, M. Cazzola and A. Corso, *American journal of hematology*, 2013, **88**, 102-106.
12. X. Wang, L. Wang, Q. Wu, F. Bao, H. Yang, X. Qiu and J. Chang, *ACS applied materials & interfaces*, 2019, **11**, 1449-1468.
13. T. Chen, Z. Zhang, D. Weng, L. Lu, X. Wang, M. Xing, H. Qiu, M. Zhao, L. Shen, Y. Zhou, J. Chang and H. P. Li, *Bioactive materials*, 2021, **6**, 3194-3206.
14. Y. Que, Z. Zhang, Y. Zhang, X. Li, L. Chen, P. Chen, C. Ou, C. Yang and J. Chang, *Bioactive Materials*, 2022, DOI: <https://doi.org/10.1016/j.bioactmat.2022.07.005>.
15. M. Yi, H. Li, X. Wang, J. Yan, L. Gao, Y. He, X. Zhong, Y. Cai, W. Feng, Z. Wen, C. Wu, C. Ou, J. Chang and M. Chen, *Advanced science (Weinheim, Baden-Wurtemberg, Germany)*, 2019, **6**, 1801260.
16. Y. Huang, C. Wu, X. Zhang, J. Chang and K. Dai, *Acta biomaterialia*, 2018, **66**, 81-92.
17. D. Vrabel, L. Pour and S. Ševčíková, *Blood reviews*, 2019, **34**, 56-66.
18. H. Li, W. Zhai and J. Chang, *Journal of biomaterials applications*, 2009, **24**, 231-246.
19. H. Li and J. Chang, *Biomaterials*, 2004, **25**, 5473-5480.
20. C. Wu and J. Chang, *Journal of Biomaterials Applications*, 2006, **21**, 119-129.
21. X. Wu, Y. Liu, E. Zhang, J. Chen, X. Huang, H. Yan, W. Cao, J. Qu, H. Gu, R. Xu, J. He and Z. Cai, *Oxidative medicine and cellular longevity*, 2020, **2020**, 6096391.
22. S. V. Rajkumar, *American journal of hematology*, 2022, **97**, 1086-1107.
23. O. M. Votyakova, *Gematologiya I Transfuziologiya*, 2015, **60**, 44-52.
24. D. Hasegawa, Y. Yoshimoto, S. Kimura, T. Kumamoto, N. Maeda, J. Hara, A. Kikuta, A. Kada, T. Kimura, Y. Iijima-Yamashita, A. M. Saito, K. Horibe, A. Manabe and C. Ogawa, *International Journal of Hematology*, 2019, **110**, 627-634.
25. J. Adams, *Cancer treatment reviews*, 2003, **29 Suppl 1**, 3-9.

26. C. R. C. Tan, S. Abdul-Majeed, B. Cael and S. K. Barta, *Clinical pharmacokinetics*, 2019, **58**, 157-168.
27. N. Kilcup, S. Gaynard, U. Werner-Zwanziger, E. Tonkopi, J. Hayes and D. Boyd, *J. Biomater. Appl.*, 2016, **30**, 1445-1459.
28. J. Y. Liang, Y. Y. Liu, J. Zou, R. B. Franklin, L. C. Costello and P. Feng, *Prostate*, 1999, **40**, 200-207.
29. S. Kowalski, S. Hac, D. Wyrzykowski, A. Zauszkiewicz-Pawlak and I. Inkielewicz-Stepniak, *Oncotarget*, 2017, **8**, 60324-60341.
30. S. Narayanan, C. Y. Cai, Y. G. Assaraf, H. Q. Guo, Q. Cui, L. Wei, J. J. Huang, C. R. Ashby, Jr and Z. S. Chen, *Drug resistance updates : reviews and commentaries in antimicrobial and anticancer chemotherapy*, 2020, **48**, 100663.
31. A. Bolomsky and R. M. Young, *Seminars in oncology*, 2022, **49**, 27-40.
32. T. Hideshima, D. Chauhan, R. Schlossman, P. Richardson and K. C. Anderson, *Oncogene*, 2001, **20**, 4519-4527.
33. J. A. DiDonato, F. Mercurio and M. Karin, *Immunological reviews*, 2012, **246**, 379-400.
34. G. Ghislat, A. S. Cheema, E. Baudoin, C. Verthuy, P. J. Ballester, K. Crozat, N. Attaf, C. Dong, P. Milpied, B. Malissen, N. Auphan-Anezin, T. P. V. Manh, M. Dalod and T. Lawrence, *Science immunology*, 2021, **6**.
35. H. Z. Chen, F. Wang, P. Gao, J. F. Pei, Y. Liu, T. T. Xu, X. Tang, W. Y. Fu, J. Lu, Y. F. Yan, X. M. Wang, L. Han, Z. Q. Zhang, R. Zhang, M. H. Zou and D. P. Liu, *Circulation research*, 2016, **119**, 1076-1088.
36. M. V. Mateos and J. F. San Miguel, *Therapeutic advances in hematology*, 2012, **3**, 117-124.
37. M. Merz, H. Salwender, M. Haenel, E. K. Mai, U. Bertsch, C. Kunz, T. Hielscher, I. W. Blau, C. Scheid, D. Hose, A. Seckinger, A. Jauch, J. Hillengass, M. S. Raab, B. Schurich, M. Munder, I. G. Schmidt-Wolf, C. Gerecke, H. W. Lindemann, M. Zeis, K. Weisel, J. Duerig and H. Goldschmidt, *Haematologica*, 2015, **100**, 964-969.
38. Z. Ye, J. Chen, Z. Xuan, W. Yang and J. Chen, *Drug design, development and therapy*, 2019, **13**, 1707-1716.
39. J. Adams, V. J. Palombella, E. A. Sausville, J. Johnson, A. Destree, D. D. Lazarus, J. Maas, C. S. Pien, S. Prakash and P. J. Elliott, *Cancer research*, 1999, **59**, 2615-2622.
40. R. Xu, Y. Li, H. Yan, E. Zhang, X. Huang, Q. Chen, J. Chen, J. Qu, Y. Liu, J. He, Q. Yi and Z. Cai, *Cell death & disease*, 2019, **10**, 781.
41. J. Chen, D. He, Q. Chen, X. Guo, L. Yang, X. Lin, Y. Li, W. Wu, Y. Yang, J. He, E. Zhang, Q. Yi and Z. Cai, *Cell death & disease*, 2017, **8**, e3161.
