# Supplementary material for: Calcium silicate/bortezomib combinatory therapy for multiple myeloma
Source: Royal Society of Chemistry journal article supplement (doi:10.1039/d2tb02009b), 2023-01-01
Supplement: d2tb02009b2.pdf [file d2tb02009b2.pdf]

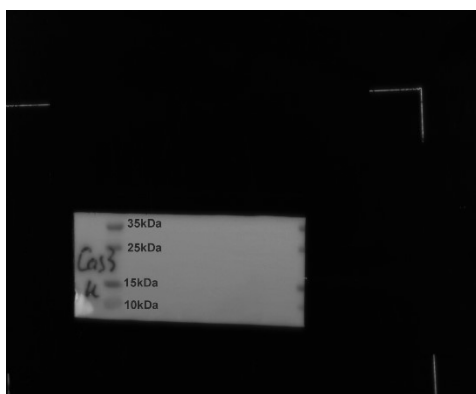

**Caspase 3-U266**

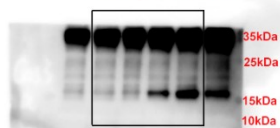

Caspase 3 raw data of U266 in Figure 1C

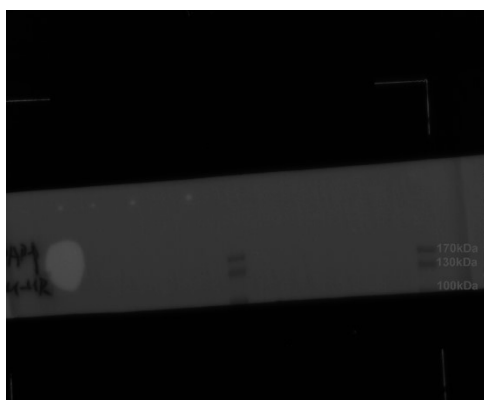

**PARP1-U266**

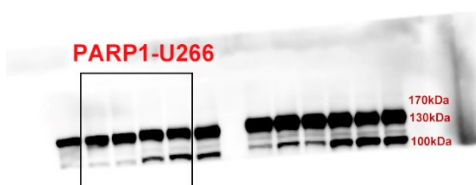

PARP1 raw data of U266 in Figure 1C

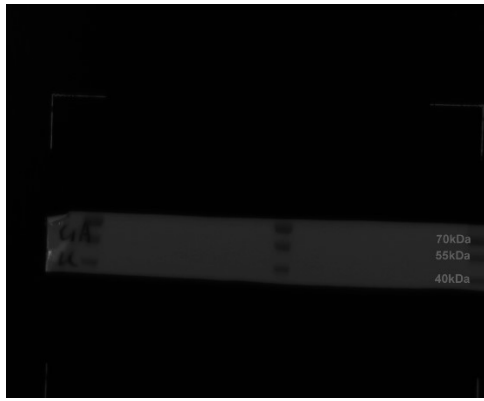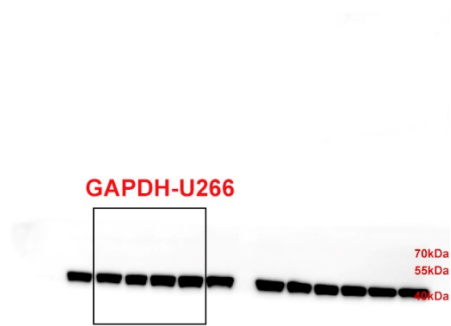

GAPDH raw data of U266 in Figure 1C

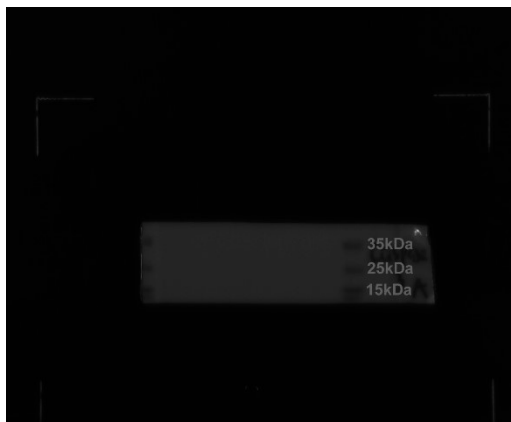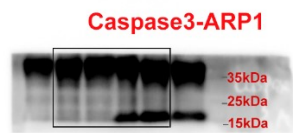

Caspase 3 raw data of ARP1 in Figure 1C

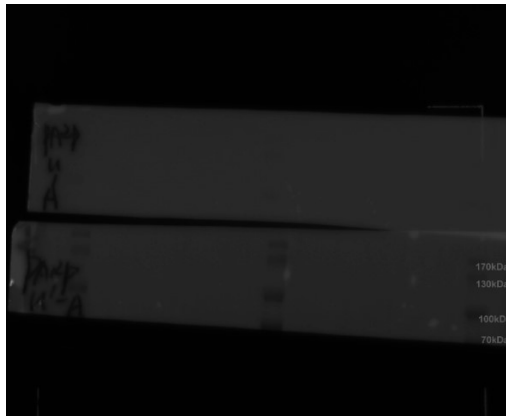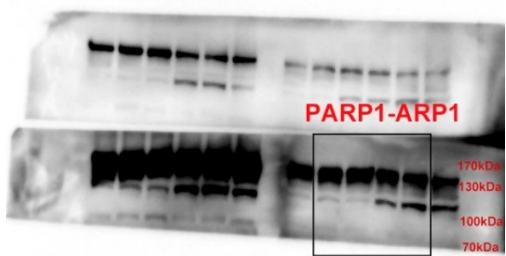

PARP1 raw data of ARP1 in Figure 1C

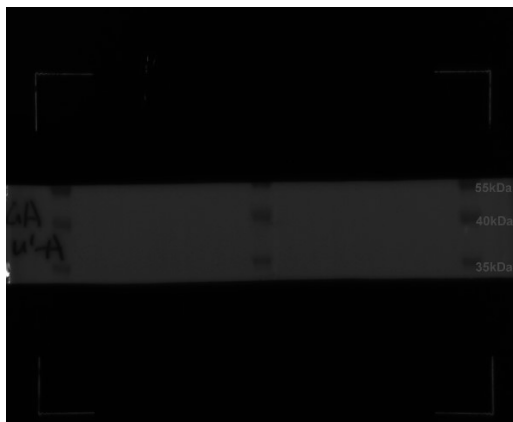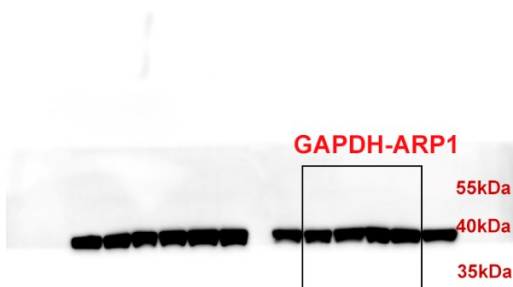

GAPDH raw data of ARP1 in Figure 1C

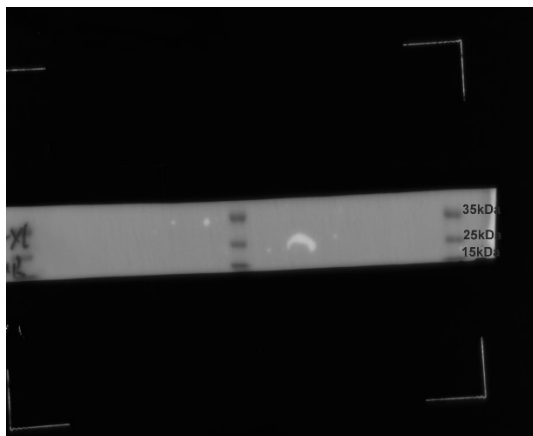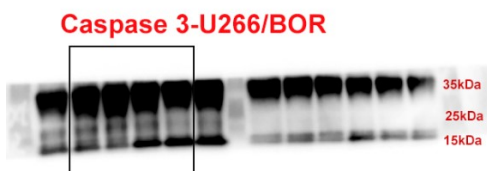

Caspase 3 raw data of U266/BOR in Figure 1C

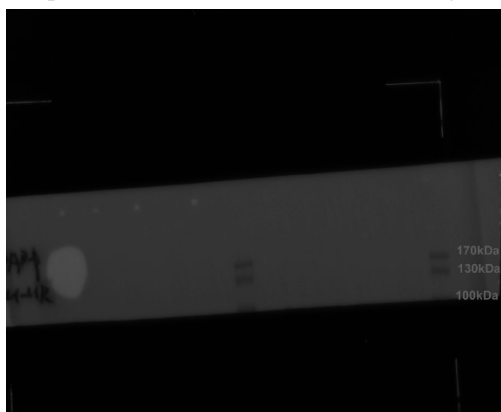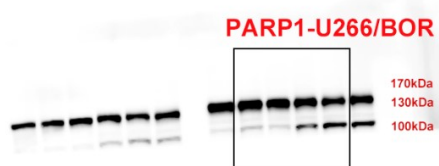

PARP1 raw data of U266/BOR in Figure 1C

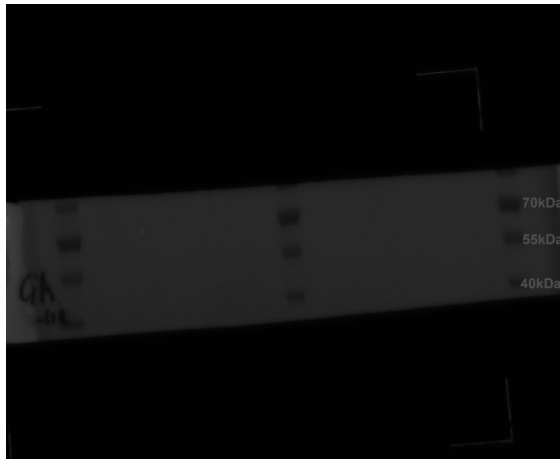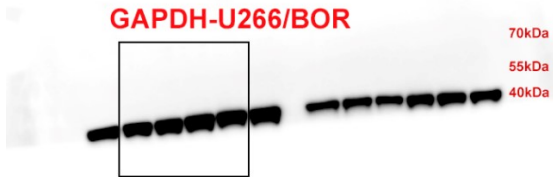

GAPDH raw data of U266/BOR in Figure 1C
