# Supplementary material for: Calcium silicate/bortezomib combinatory therapy for multiple myeloma
Source: Royal Society of Chemistry journal article supplement (doi:10.1039/d2tb02009b), 2023-01-01
Supplement: d2tb02009b3.pdf [file d2tb02009b3.pdf]

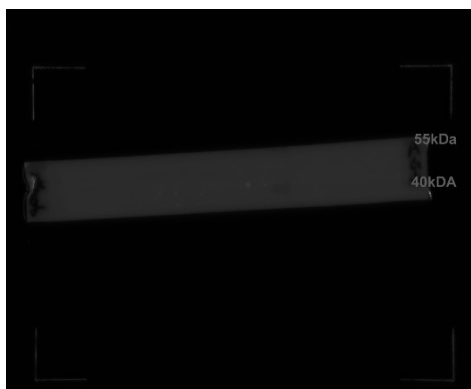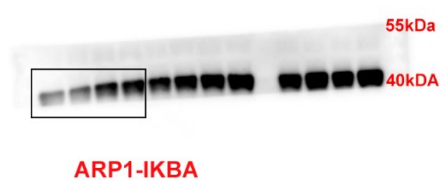

IKBa raw data of ARP1 in Figure 5A

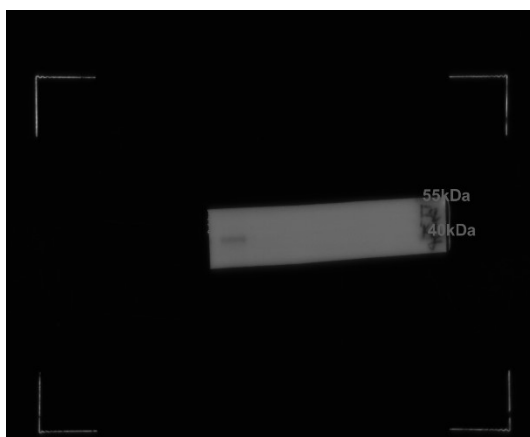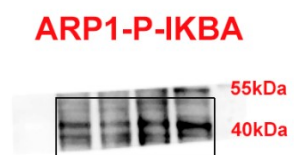

P-IKBa raw data of ARP1 in Figure 5A

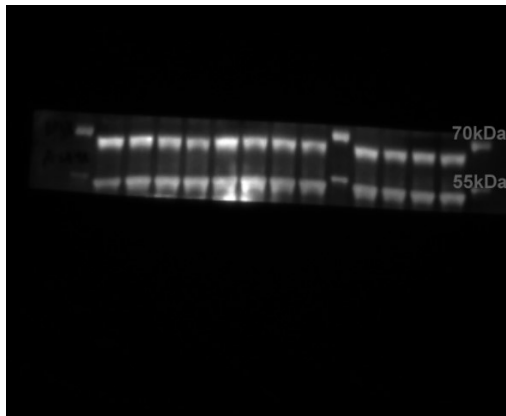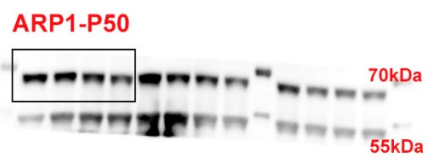

P50 raw data of ARP1 in Figure 5A

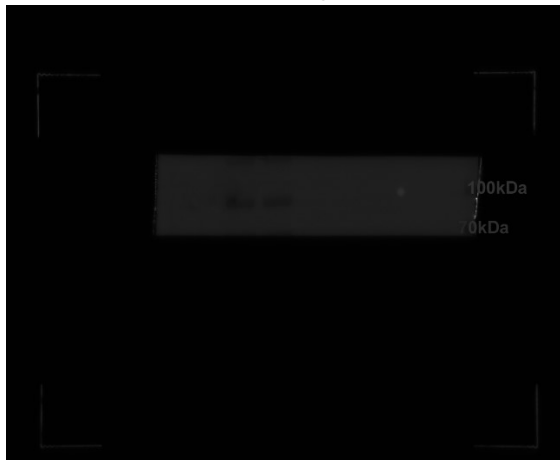

**ARP1-P105**

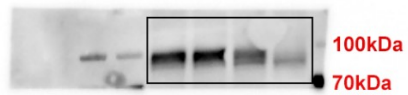

P105 raw data of ARP1 in Figure 5A

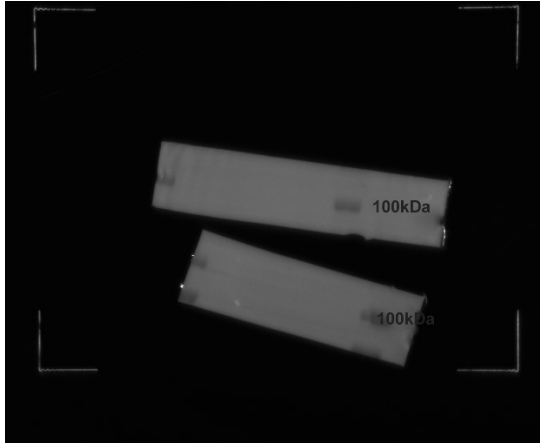

**ARP1-P-P105**

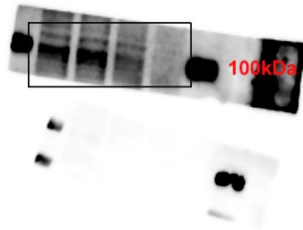

P-P105 raw data of ARP1 in Figure 5A

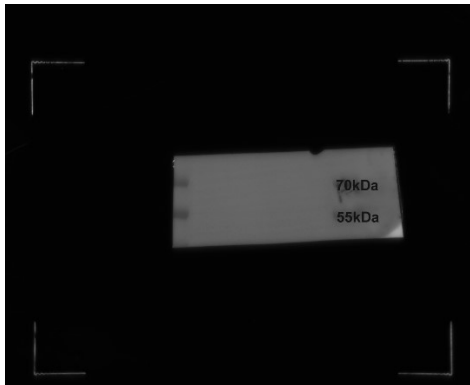

**ARP1-P65**

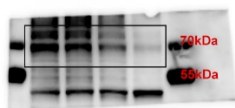

P65 raw data of ARP1 in Figure 5A

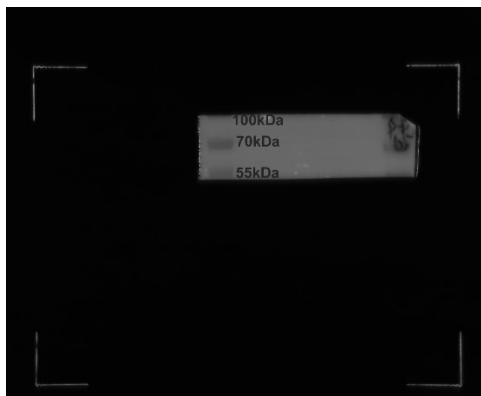

**ARP1-P-P65**

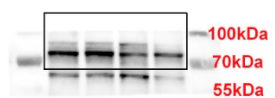

P-P65 raw data of ARP1 in Figure 5A

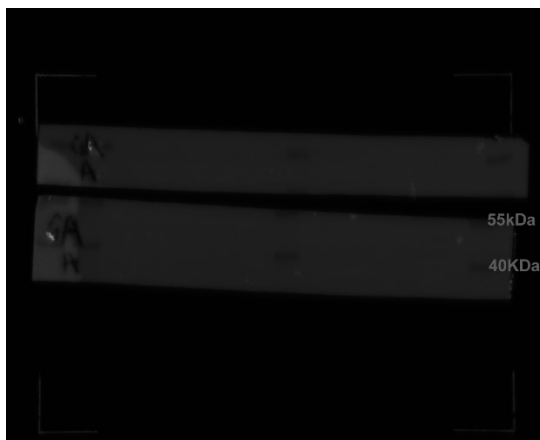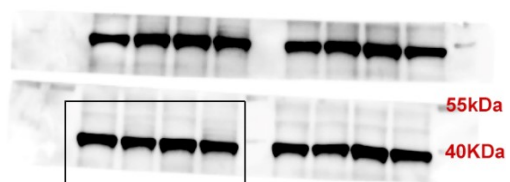

**ARP1-GAPDH**

GAPDH raw data of ARP1 in Figure 5A

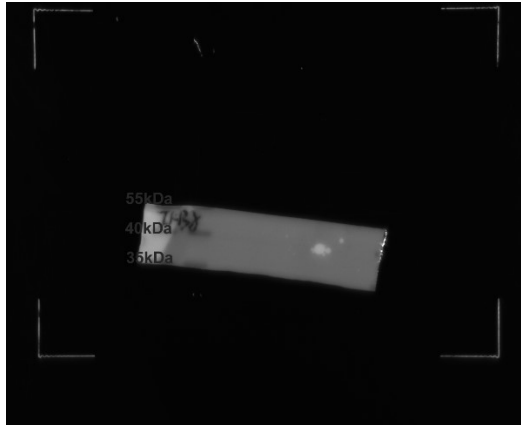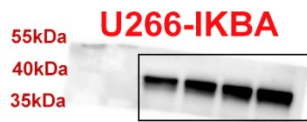

IKBa raw data of U266 in Figure 5A

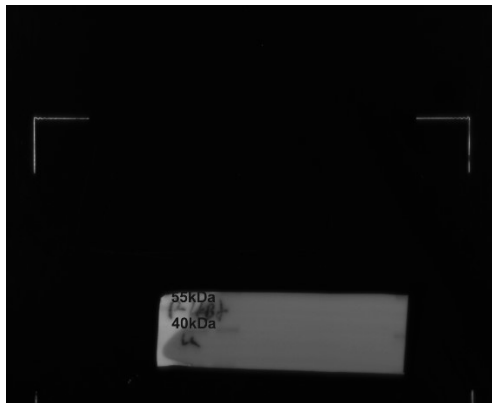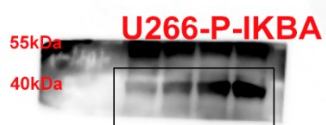

P-IKBa raw data of U266 in Figure 5A

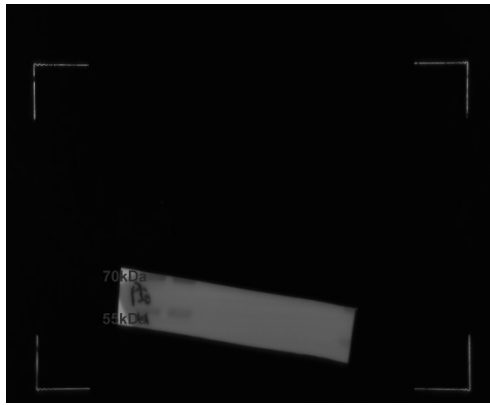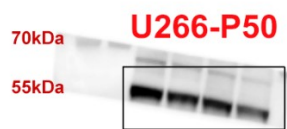

P50 raw data of U266 in Figure 5A

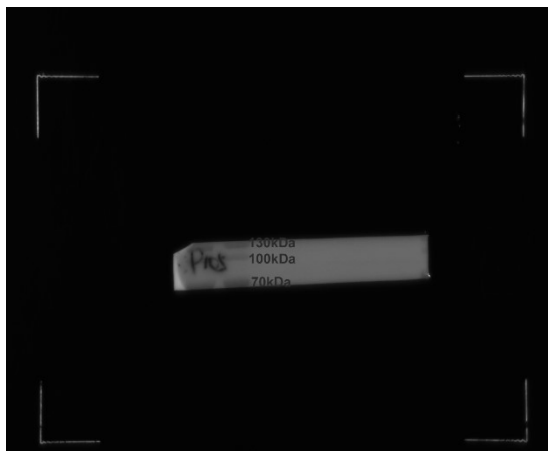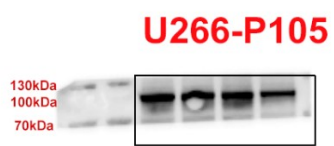

P105 raw data of U266 in Figure 5A

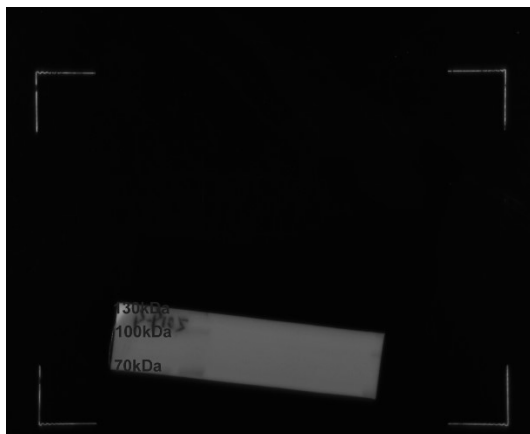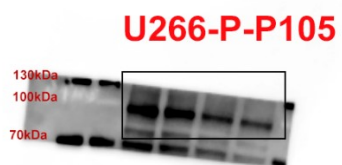

P-P105 raw data of U266 in Figure 5A

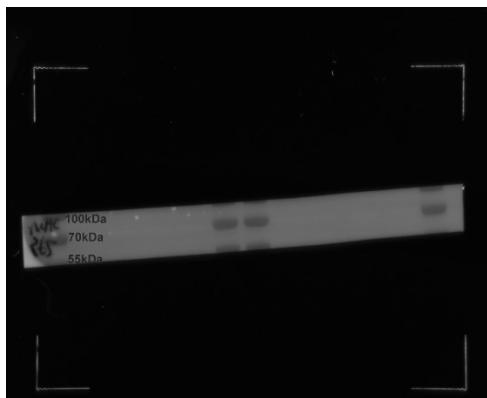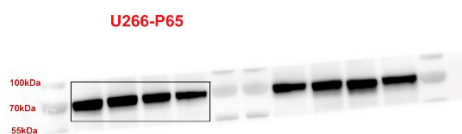

P65 raw data of U266 in Figure 5A

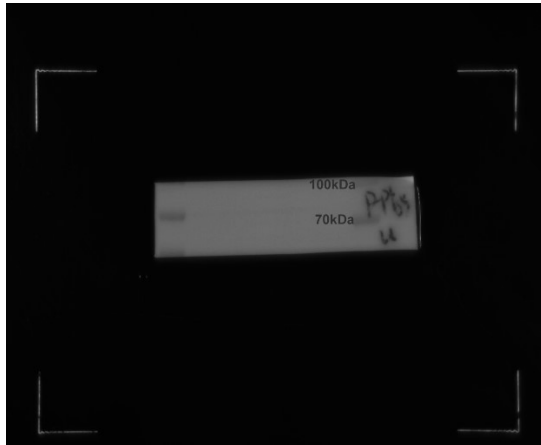

**U266-P-P65**

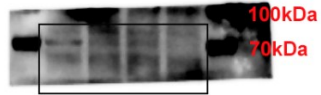

P-P65 raw data of U266 in Figure 5A

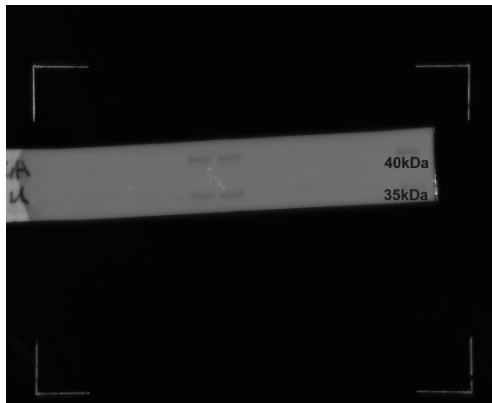

**U266-GAPDH**

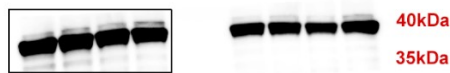

GAPDH raw data of U266 in Figure 5A



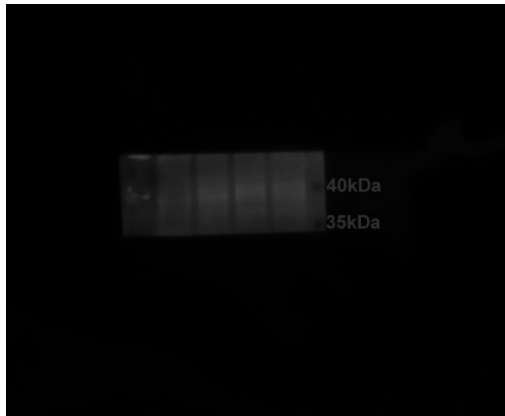

**U266/BOR-IKBA**

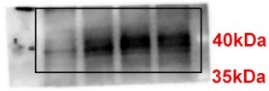

IKBa raw data of U266/BOR in Figure 5A

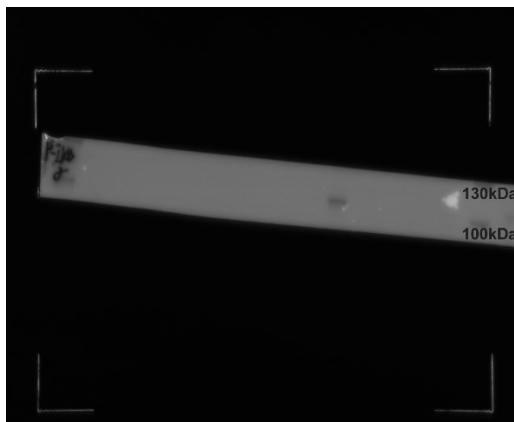

**U266/BOR-P-IKBA**

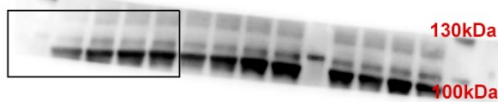

P-IKBa raw data of U266/BOR in Figure 5A

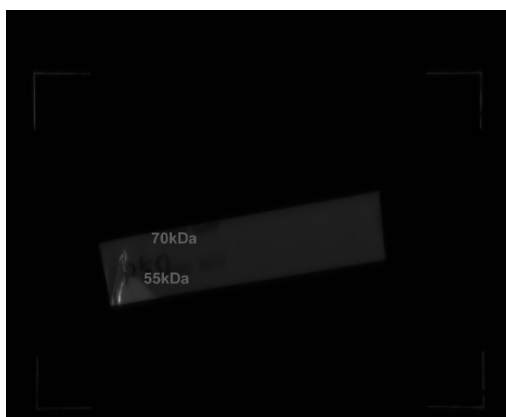

**U266/BOR-P50**

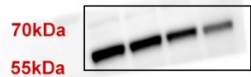

P50 raw data of U266/BOR in Figure 5A

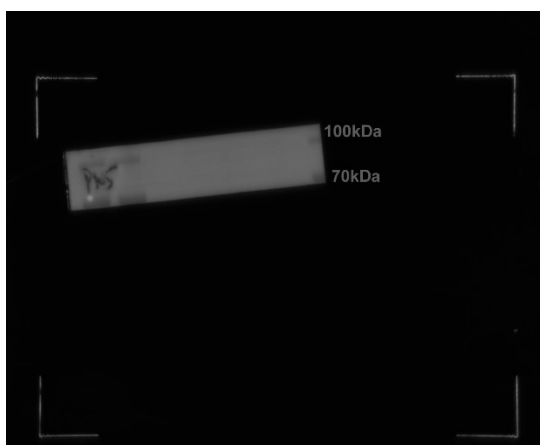

**U266/BOR-P105**

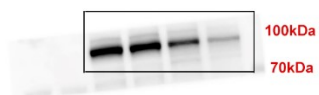

P105 raw data of U266/BOR in Figure 5A

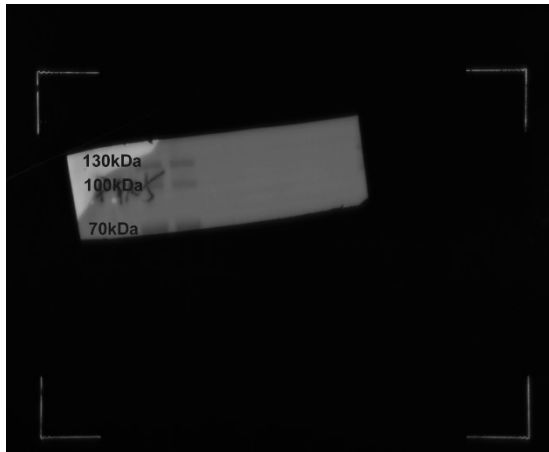

### U266/BOR-P-P105

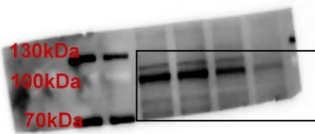

P-P105 raw data of U266/BOR in Figure 5A

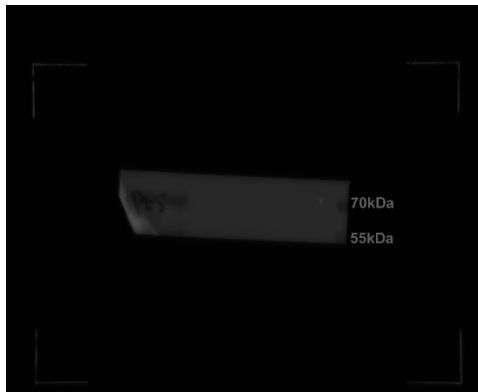

### U266/BOR-P65

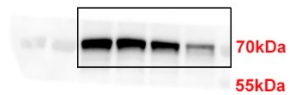

P65 raw data of U266/BOR in Figure 5A

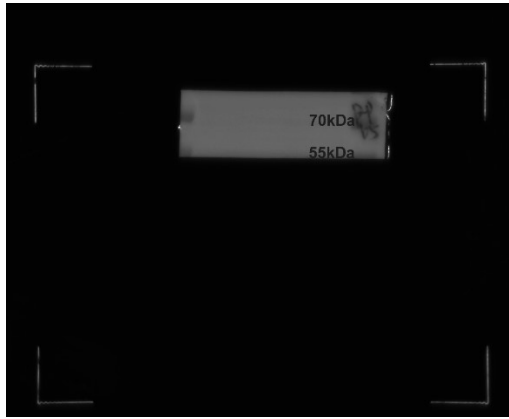

**U266/BOR-P-P65**

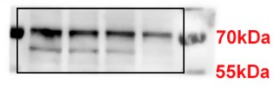

P-P65 raw data of U266/BOR in Figure 5A

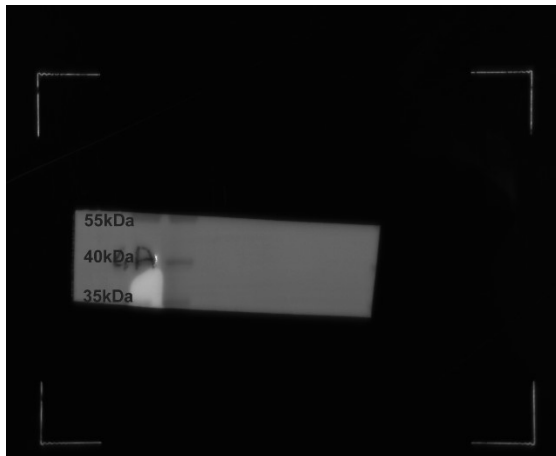

**U266/BOR-GAPDH**

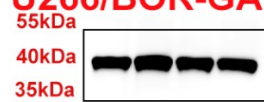

GAPDH raw data of U266/BOR in Figure 5A
